# Supplementary material
Source: PubMed Central journal article supplement (PMC3876812)
Supplement: supp_mol.113.086595_All_supplemental_files-051513.pdf [file supp_mol.113.086595_All_supplemental_files-051513.pdf]

Clemencia Pinilla, Bruce S. Edwards, Jon R. Appel, Tina Yates-Gibbins, Marc A. Giulianotti, Jose L. Medina-Franco, Susan M. Young, Radleigh G. Santos, Larry A. Sklar, and Richard A. Houghten  
 Selective agonists and antagonists of formylpeptide receptors:  
 duplex flow cytometry and mixture-based positional scanning libraries  
 Molecular Pharmacology

**Figure S1.** Analytical data for individual compounds shown in Table 2. The analytical data was obtained using a Shimadzu LCMS 2010 in ESI positive mode. The samples were run using a Phenomenex Luna C18 100A 50x4.60 5micron column. The two solvents used for the column runs were solvent A (water with 0.01% Formic acid) and solvent B (acetonitrile with 0.01% Formic acid). The gradient used is 5% to 95% over 6 minutes with an additional 2 minute clean time at 95% and another 3 minute equilibration at 5%. Sample 1753-103 used a gradient of 5% to 95% over 6 minutes with an additional 22 minute clean time at 95% and another 2 minute equilibration at 5%. Shown is the 254 nm UV trace, integrated UV peak table, total ion count trace for the desired product, and associated MW spectrum for each compound. The summary of these results is shown in Table S3.

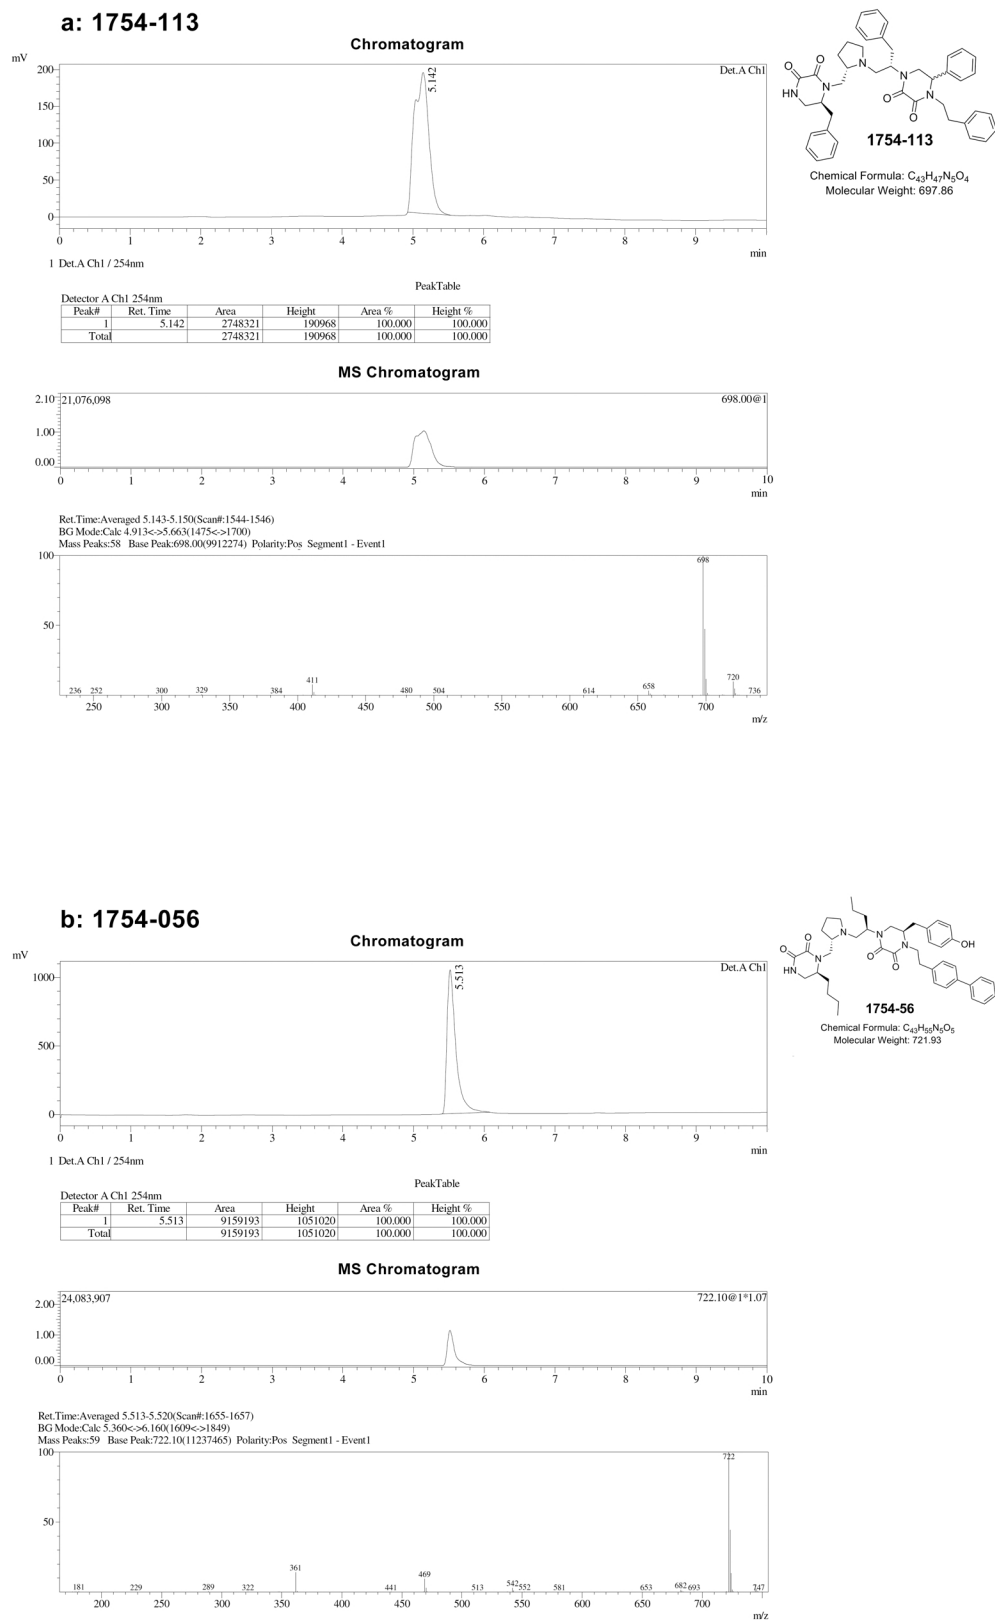

Clemencia Pinilla, Bruce S. Edwards, Jon R. Appel, Tina Yates-Gibbins, Marc A. Giulianotti, Jose L. Medina-Franco, Susan M. Young, Radleigh G. Santos, Larry A. Sklar, and Richard A. Houghten  
 Selective agonists and antagonists of formylpeptide receptors:  
 duplex flow cytometry and mixture-based positional scanning libraries  
 Molecular Pharmacology

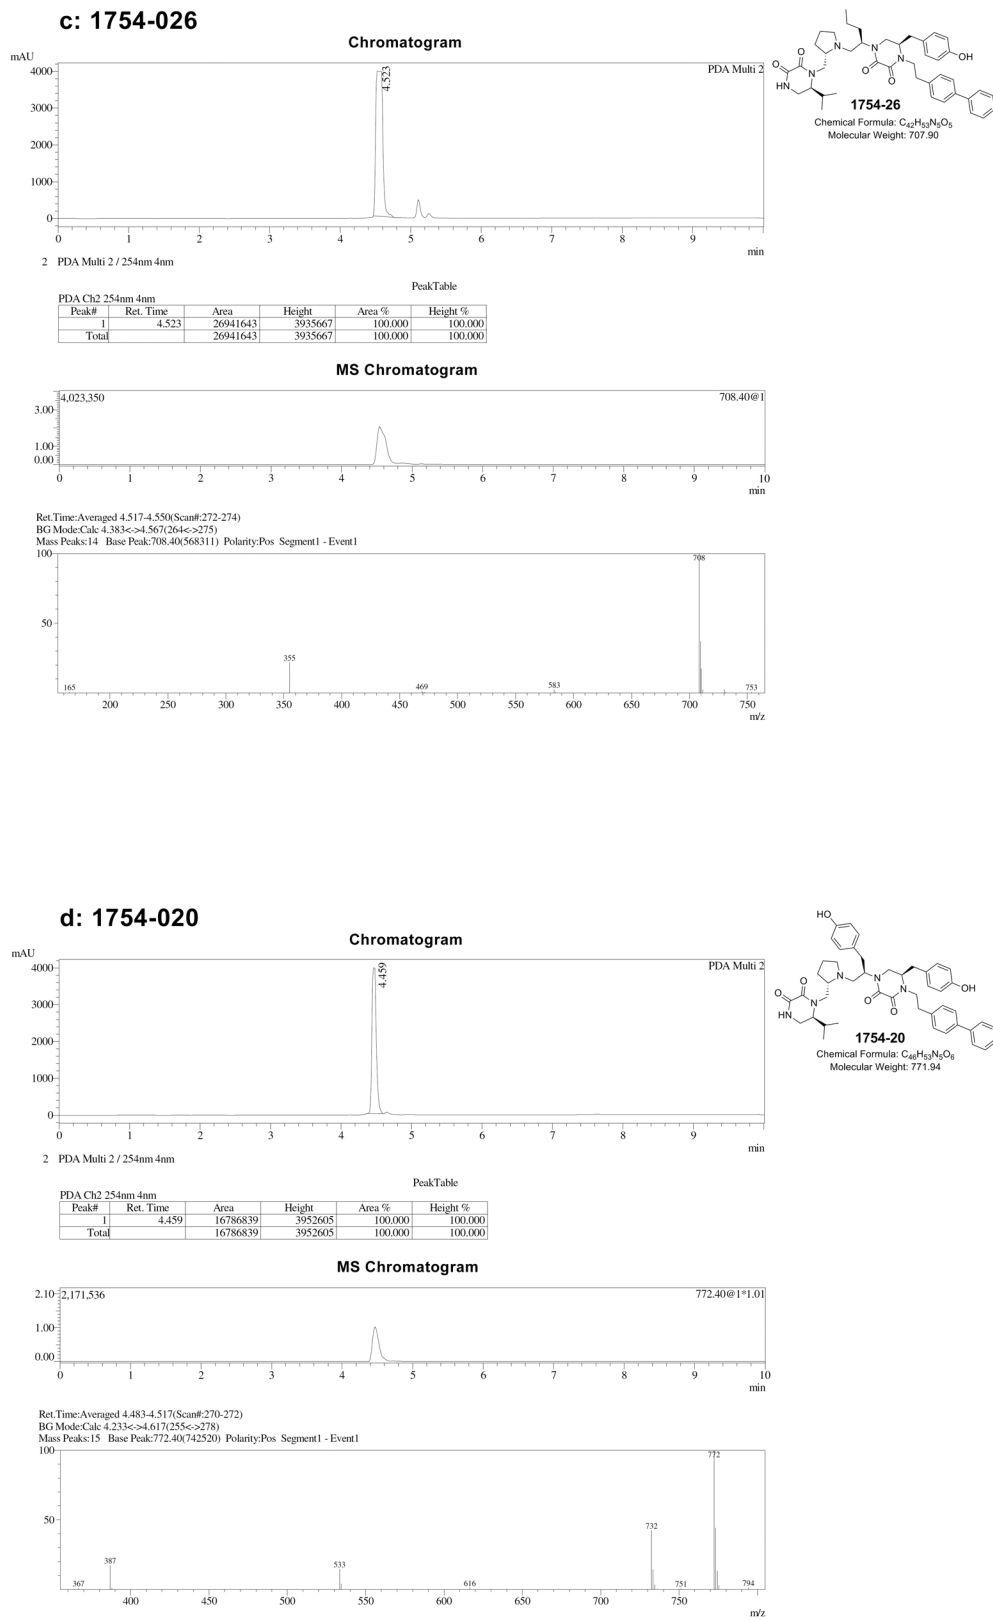

**Figure S1.** Analytical data for individual compounds shown in Table 2. The analytical data was obtained using a Shimadzu LCMS 2010 in ESI positive mode. The samples were run using a Phenomenex Luna C18 100A 50x4.60 5micron column. The two solvents used for the column runs were solvent A (water with 0.01% Formic acid) and solvent B (acetonitrile with 0.01% Formic acid). The gradient used is 5% to 95% over 6 minutes with an additional 2 minute clean time at 95% and another 3 minute equilibration at 5%. Sample 1753-103 used a gradient of 5% to 95% over 6 minutes with an additional 22 minute clean time at 95% and another 2 minute equilibration at 5%. Shown is the 254 nm UV trace, integrated UV peak table, total ion count trace for the desired product, and associated MW spectrum for each compound. The summary of these results is shown in Table S3.

Clemencia Pinilla, Bruce S. Edwards, Jon R. Appel, Tina Yates-Gibbins, Marc A. Giulianotti, Jose L. Medina-Franco, Susan M. Young, Radleigh G. Santos, Larry A. Sklar, and Richard A. Houghten  
 Selective agonists and antagonists of formylpeptide receptors:  
 duplex flow cytometry and mixture-based positional scanning libraries  
 Molecular Pharmacology

**Figure S1.** Analytical data for individual compounds shown in Table 2. The analytical data was obtained using a Shimadzu LCMS 2010 in ESI positive mode. The samples were run using a Phenomenex Luna C18 100A 50x4.60 5micron column. The two solvents used for the column runs were solvent A (water with 0.01% Formic acid) and solvent B (acetonitrile with 0.01% Formic acid). The gradient used is 5% to 95% over 6 minutes with an additional 2 minute clean time at 95% and another 3 minute equilibration at 5%. Sample 1753-103 used a gradient of 5% to 95% over 6 minutes with an additional 22 minute clean time at 95% and another 2 minute equilibration at 5%. Shown is the 254 nm UV trace, integrated UV peak table, total ion count trace for the desired product, and associated MW spectrum for each compound. The summary of these results is shown in Table S3.

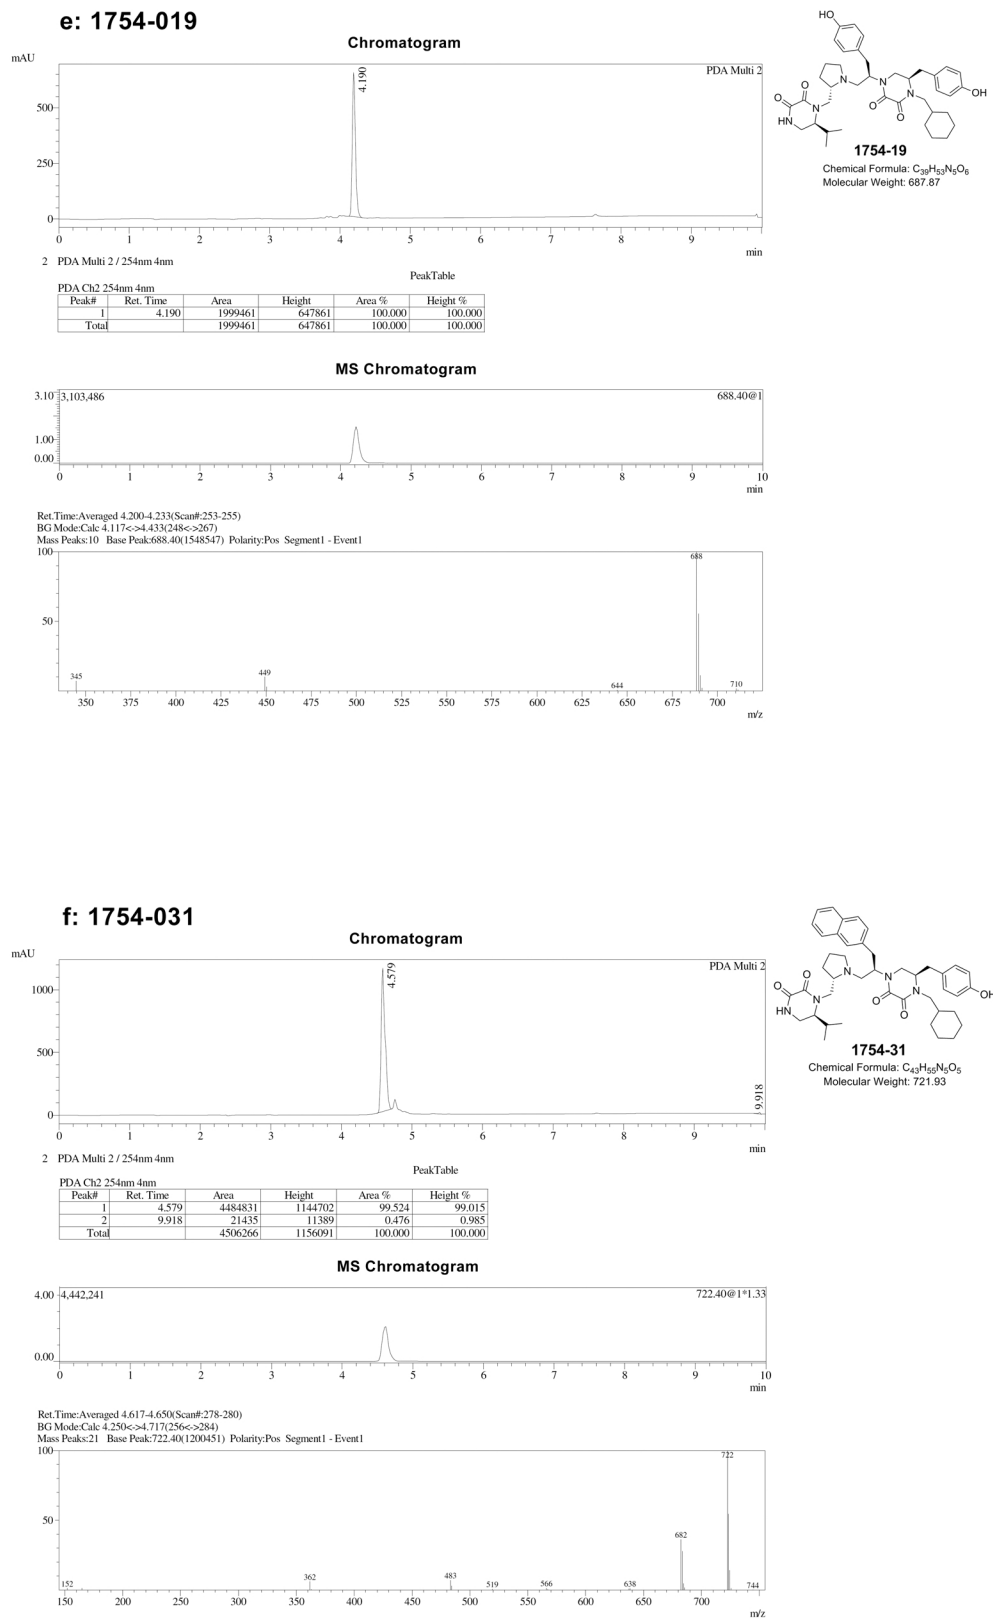

Clemencia Pinilla, Bruce S. Edwards, Jon R. Appel, Tina Yates-Gibbins, Marc A. Giulianotti, Jose L. Medina-Franco, Susan M. Young, Radleigh G. Santos, Larry A. Sklar, and Richard A. Houghten  
 Selective agonists and antagonists of formylpeptide receptors:  
 duplex flow cytometry and mixture-based positional scanning libraries  
 Molecular Pharmacology

**Figure S1.** Analytical data for individual compounds shown in Table 2. The analytical data was obtained using a Shimadzu LCMS 2010 in ESI positive mode. The samples were run using a Phenomenex Luna C18 100A 50x4.60 5micron column. The two solvents used for the column runs were solvent A (water with 0.01% Formic acid) and solvent B (acetonitrile with 0.01% Formic acid). The gradient used is 5% to 95% over 6 minutes with an additional 2 minute clean time at 95% and another 3 minute equilibration at 5%. Sample 1753-103 used a gradient of 5% to 95% over 6 minutes with an additional 22 minute clean time at 95% and another 2 minute equilibration at 5%. Shown is the 254 nm UV trace, integrated UV peak table, total ion count trace for the desired product, and associated MW spectrum for each compound. The summary of these results is shown in Table S3.

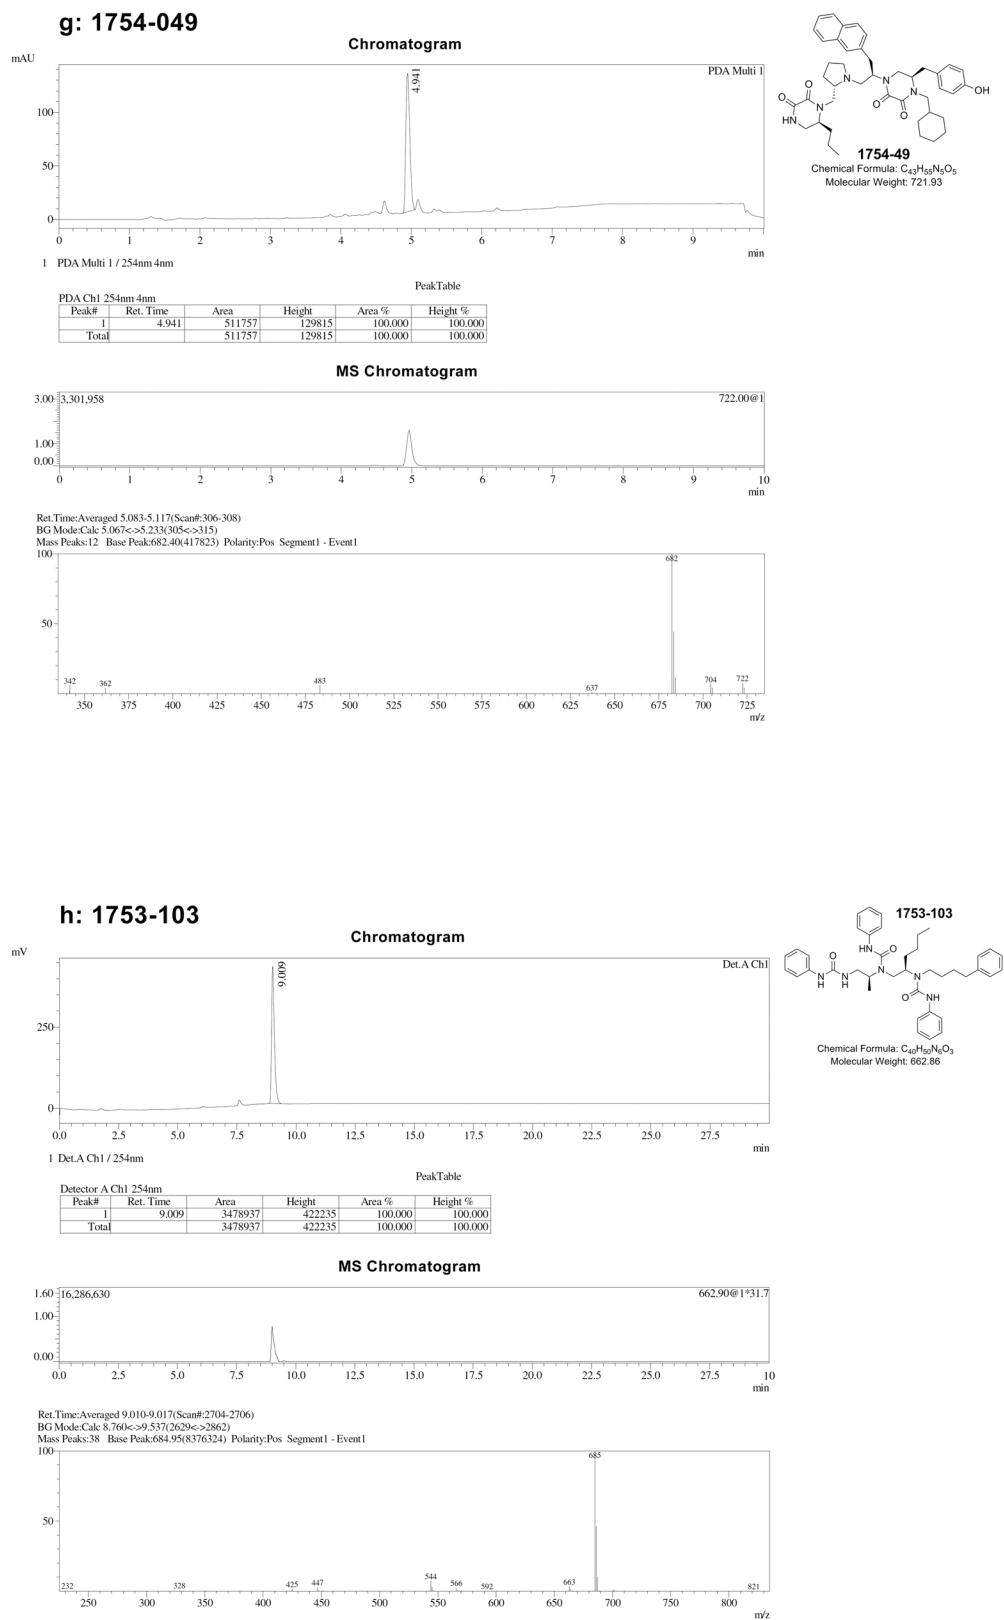



Clemencia Pinilla, Bruce S. Edwards, Jon R. Appel, Tina Yates-Gibbins, Marc A. Giulianotti, Jose L. Medina-Franco, Susan M. Young, Radleigh G. Santos, Larry A. Sklar, and Richard A. Houghten

Selective agonists and antagonists of formylpeptide receptors:  
duplex flow cytometry and mixture-based positional scanning libraries

Molecular Pharmacology

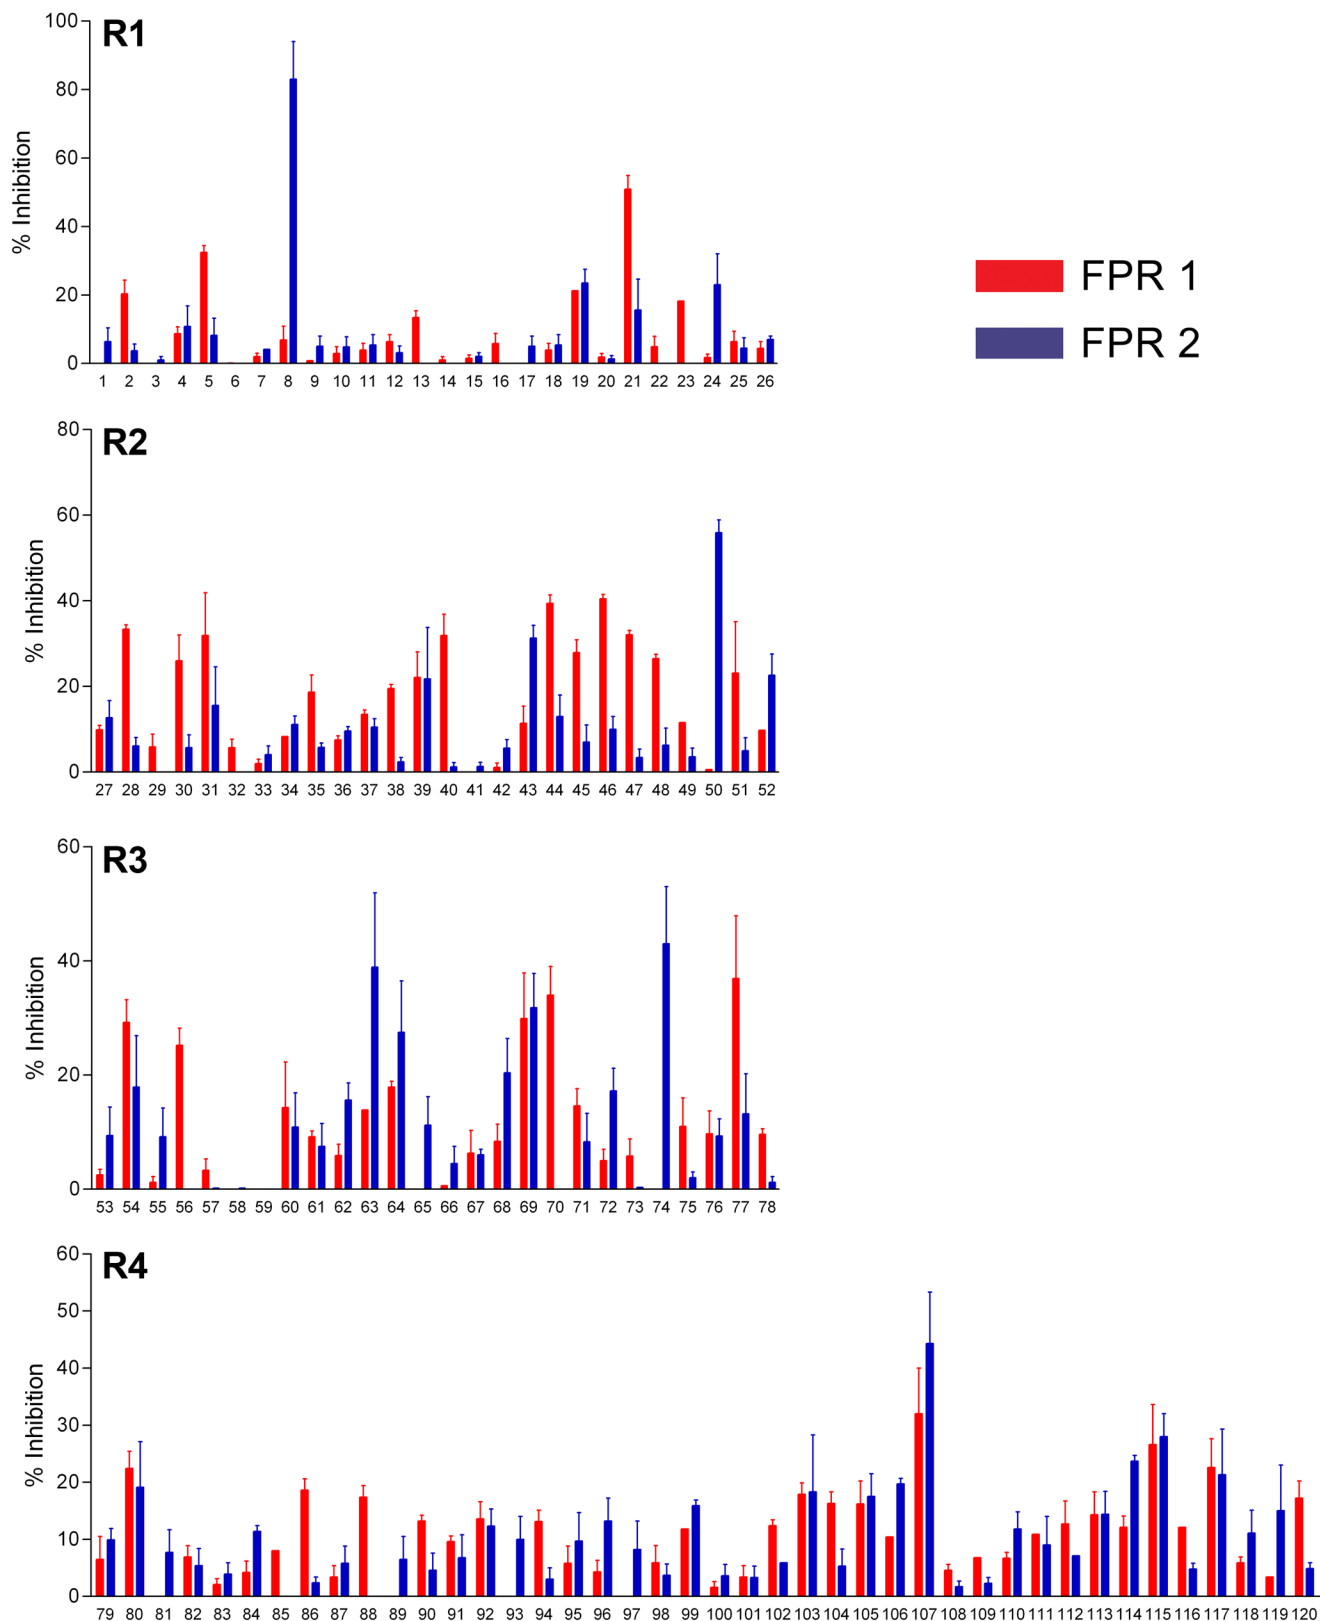

**Figure S2.** Activity profiles for FPR1 and FPR2 screened against pyrrolidine bis-diketopiperazine positional scanning library (library 21 in Figure 1, library 1344 in Table S1). Each bar represents the activity (% inhibition of labeled ligand binding to receptor) for a given mixture at each of the 4 positions of diversity (R1-R4). See Table S2 for library 1344 details.

**Figure S3.** Agonist and antagonist concentration dependent activity of selected compounds. Test compounds with agonist activity (left column) were added to mixtures of FPR1 and FPR2 cells at the indicated final concentrations to determine changes in Fluo4 fluorescence intensity in FPR1 cells (squares) and FPR2 cells (circles), indicative of mobilization of intracellular calcium. Responses were normalized to results observed with control peptides (4pep for FPR1 and Wpep for FPR2) as described in the methods section. Test compounds with antagonist activity (right column) were pre-incubated 5 min with mixtures of differentially labeled FPR1 and FPR2 cells after which control peptides were added and Fluo4 fluorescence intensity changes in FPR1 cells (top two figures) or FPR2 cells (bottom two figures) were recorded.

Responses were normalized with respect to results observed when cells were treated with fMLFF alone (FPR1 cells) or WPeP alone (FPR2 cells), each used at its predetermined EC90 concentration. Curves were fit by GraphPad Prism 5.0 software to a 4 parameter logistic sigmoidal dose-response model in which one parameter (Bottom) was constrained to a value of 0%. The other parameters (Top, EC50 and Hill Slope) were determined by the fitted curve. In agonist determinations (left column) the fitted response plateau (Top) corresponded to response efficacy, the maximum response achieved relative to appropriate control peptide. Response efficacies of 1754-49, 1754-56 and 1753-103 were 67, 98 and 78%, respectively.

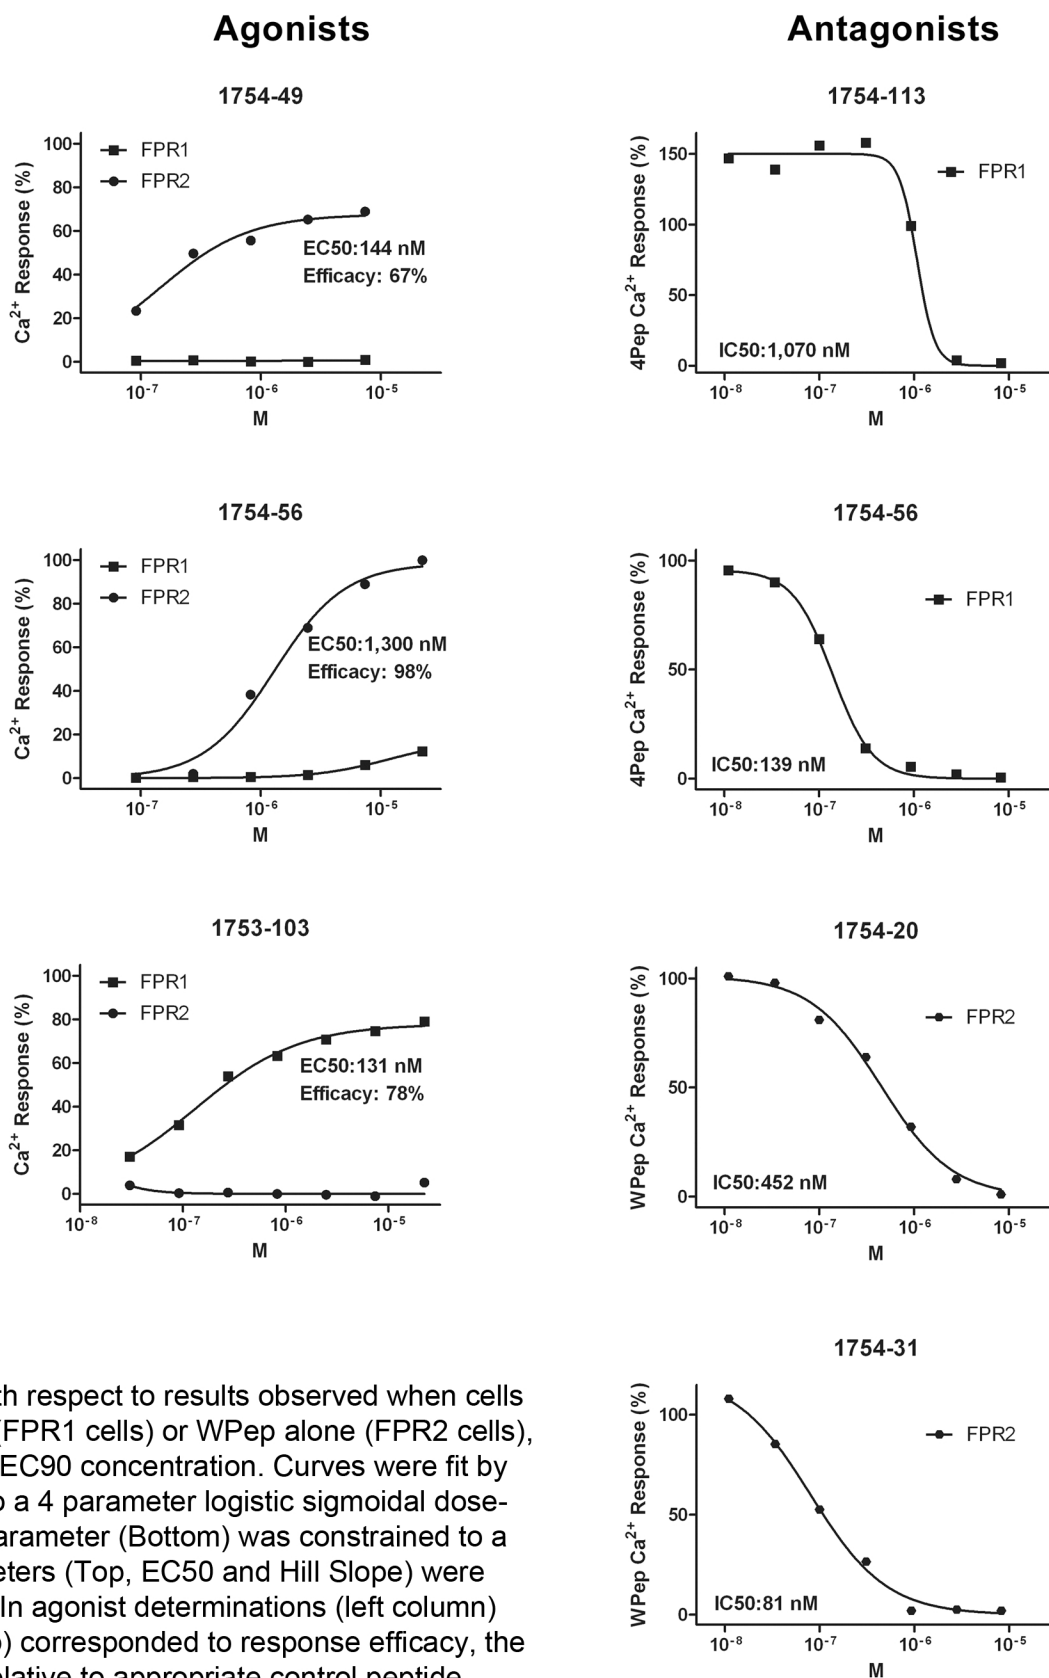

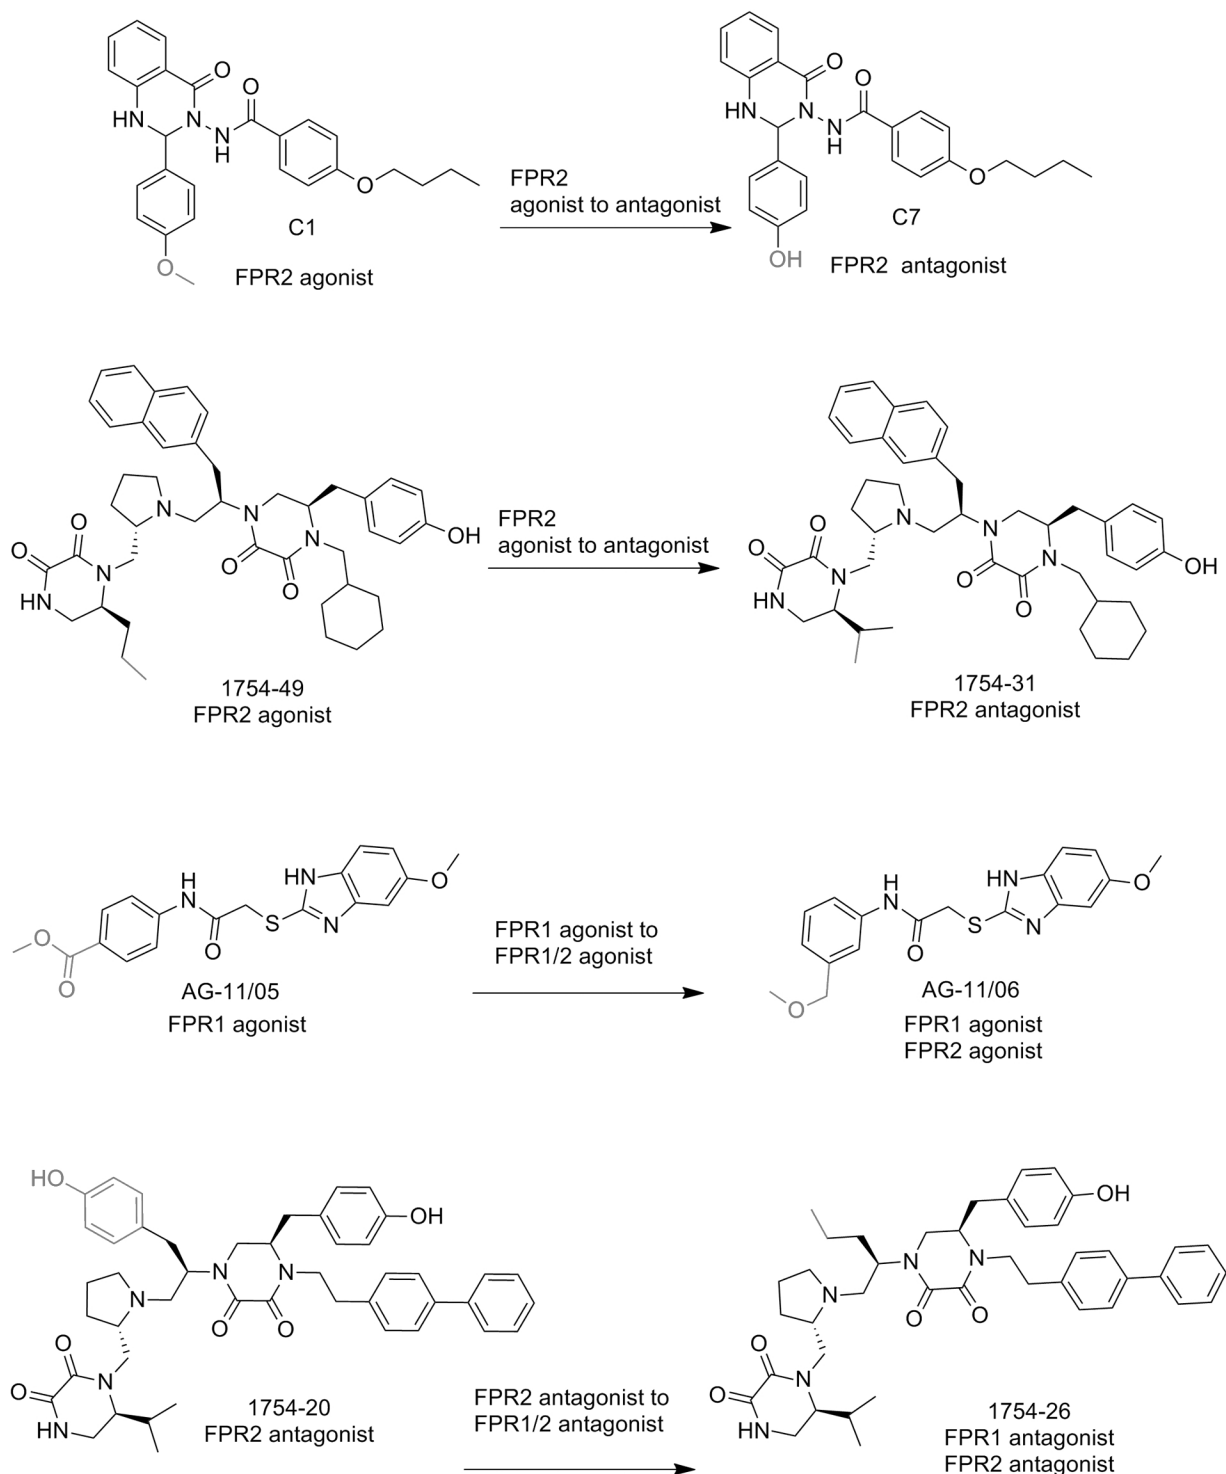

**Figure S4.** Structural differences result in shift of receptor functionality or specificity. Previously reported C1 to C7 (1) and AG-11/05 to AG-11/06 (2) as well as examples shown in this work [1754-49 to 1754-31 and 1754-20 to 1754-26] where slight structural modifications to a ligand produced a shift in receptor functionality.

1. Zhou C et al. (2007) Pharmacological characterization of a novel nonpeptide antagonist for formyl peptide receptor-like 1. *Mol Pharmacol* 72:976-983.
2. Kirpotina LN et al. (2010) Identification of novel small-molecule agonists for human formyl peptide receptors and pharmacophore models of their recognition. *Mol Pharmacol* 77:159-170.

Table S1. 37 small-molecule libraries tested against FPR1 and FPR2.

| Number | Library | Samples | Compounds/mix | Total      | Name                             | Structure                                                                             |
|--------|---------|---------|---------------|------------|----------------------------------|---------------------------------------------------------------------------------------|
| 1      | 506     | 364     | 230           | 42,320     | Alkylated triamine               | 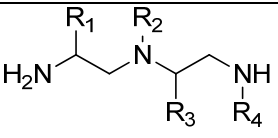   |
| 2      | 531     | 141     | 2,009 -2,499  | 102,459    | Bicyclic guanidine               |    |
| 3      | 882     | 125     | 1,681 – 1,763 | 72,283     | C-6-acylamino bicyclic guanidine |    |
| 4      | 886     | 95      | 48            | 4,560      | Benzothiazepene                  |   |
| 5      | 914     | 150     | 2,500         | 125,000    | N-acyl triamine                  |  |
| 6      | 923     | 240     | 216,000       | 12,960,000 | L-, D-, unnatural Tetrapeptide   |  |
| 7      | 924     | 240     | 216,000       | 12,960,000 | L-, D-, unnatural Tetrapeptide   |  |
| 8      | 1002    | 109     | 1,190 – 1,400 | 47,600     | Urea-linked bicyclic guanidine   |  |

|    |      |     |               |        |                                          |                                                                                       |
|----|------|-----|---------------|--------|------------------------------------------|---------------------------------------------------------------------------------------|
| 9  | 1169 | 110 | 1,092 -1,764  | 45,864 | Bis-cyclic guanidine                     | 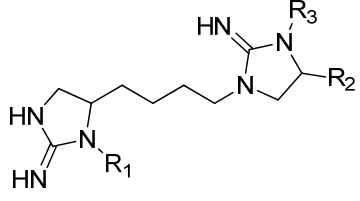   |
| 10 | 1170 | 110 | 1,092 -1,764  | 45,864 | Bis-diketopiperazine                     |    |
| 11 | 1171 | 110 | 1,092 -1,764  | 45,864 | Bis-cyclic thiourea                      |    |
| 12 | 1172 | 110 | 1,092 -1,764  | 45,864 | Bis-piperazine                           |   |
| 13 | 1174 | 110 | 1,092 -1,764  | 45,864 | N-acylated Bis-piperazine                |  |
| 14 | 1275 | 116 | 1,258 - 1,665 | 56,610 | Dihydroimidazolyl-butyl-diketopiperazine |  |

|    |      |     |                 |         |                                           |  |
|----|------|-----|-----------------|---------|-------------------------------------------|--|
| 15 | 1276 | 116 | 1,258 – 1,665   | 56,610  | Dihydroimidazolyl-butyl-cyclic thiourea   |  |
| 16 | 1277 | 400 | 41              | 16,400  | Guanidino hydantoin                       |  |
| 17 | 1295 | 107 | 1,224 – 1,332   | 45,288  | Acylated cyclic guanidine                 |  |
| 18 | 1319 | 116 | 1,258 – 1,665   | 56,610  | Dihydroimidazolyl-butyl-cyclic urea       |  |
| 19 | 1324 | 116 | 1,258 – 1,665   | 56,610  | Dihydroimidazolyl-methyl-diketopiperazine |  |
| 20 | 1343 | 120 | 17,576 - 28,392 | 738,192 | Pyrrolidine pentamine                     |  |
| 21 | 1344 | 120 | 17,576 - 28,392 | 738,192 | Pyrrolidine Bis-diketopiperazine          |  |
| 22 | 1345 | 120 | 17,576 - 28,392 | 738,192 | Pyrrolidine Bis-piperazine                |  |

|    |      |     |                 |         |                                                    |  |
|----|------|-----|-----------------|---------|----------------------------------------------------|--|
| 23 | 1346 | 120 | 17,576 - 28,392 | 738,192 | Pyrrolidine Bis-cyclic guanidine                   |  |
| 24 | 1347 | 120 | 17,576 - 28,392 | 738,192 | Pyrrolidine Bis-cyclic thiourea                    |  |
| 25 | 1387 | 400 | 40              | 16,000  | Trisubstituted triazinobenzimidazoles              |  |
| 26 | 1409 | 400 | 27              | 10,800  | Triazinetrione                                     |  |
| 27 | 1418 | 96  | 783 -1,160      | 31,320  | N-Methyl-1,4,5-trisubstituted-2,3-diketopiperazine |  |
| 28 | 1419 | 96  | 783 -1,160      | 31,320  | N-Benzyl-1,4,5-trisubstituted-2,3-diketopiperazine |  |
| 29 | 1420 | 96  | 783 -1,160      | 31,320  | N-methylated 1,3,4-trisubstituted piperazine       |  |
| 30 | 1421 | 96  | 783 -1,160      | 31,320  | N-benzylated 1,3,4-trisubstituted piperazine       |  |

|    |      |     |               |         |                                               |                                                                                       |
|----|------|-----|---------------|---------|-----------------------------------------------|---------------------------------------------------------------------------------------|
| 31 | 1422 | 96  | 783 -1,160    | 31,320  | N-Methyltriamine                              | 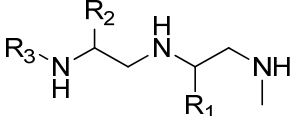   |
| 32 | 1433 | 74  | 361 - 684     | 12,996  | Nitrosamine                                   |    |
| 33 | 1455 | 174 | 3,364         | 195,112 | L-, D-, unnatural Tripeptide                  |    |
| 34 | 1456 | 174 | 3,364         | 195,112 | Tetramine                                     |    |
| 35 | 1477 | 174 | 3,364         | 195,112 | Platinum tetramine                            |    |
| 36 | 1481 | 135 | 1,872 – 2,304 | 89,856  | Poly-phenylurea                               |   |
| 37 | 1509 | 319 | 42            | 13,398  | 2-imino-1,3,5-triazino [1,2-a] benzimidazoles |  |



Table S2. Pyrrolidine bis-diketopiperazine positional scanning library (1344, library 21 in Figure 1) and resulting functionalities at the four positions of diversity.

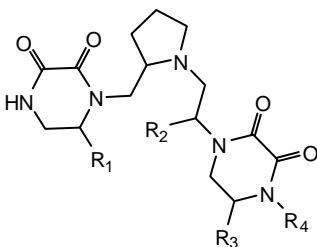

|    | Number | Building block                                                  | Functionality                      |                      |
|----|--------|-----------------------------------------------------------------|------------------------------------|----------------------|
| 1  | 27     | 53                                                              | Boc-L-Ala                          | S-methyl             |
| 2  | 28     | 54                                                              | Boc-L-Phe                          | S-benzyl             |
| 3  | 29     | 55                                                              | Boc-Gly                            | Hydrogen             |
| 4  | 30     | 56                                                              | Boc-L-Ile                          | S-2-butyl            |
| 5  | 31     | 57                                                              | Boc-L-Leu                          | S-isobutyl           |
| 6  | 32     | 58                                                              | Boc-L-Ser(Bzl)                     | R-hydroxymethyl      |
| 7  | 33     | 59                                                              | Boc-L-Thr(Bzl)                     | (R,R)-1-hydroxyethyl |
| 8  | 34     | 60                                                              | Boc-L-Val                          | S-isopropyl          |
| 9  | 35     | 61                                                              | Boc-L-Tyr(BrZ)                     | S-4-hydroxybenzyl    |
| 10 | 36     | 62                                                              | Boc-D-Ala                          | R-methyl             |
| 11 | 37     | 63                                                              | Boc-D-Phe                          | R-benzyl             |
| 12 | 38     | 64                                                              | Boc-D-Ile                          | R-2-butyl            |
| 13 | 39     | 65                                                              | Boc-D-Leu                          | R-isobutyl           |
| 14 | 40     | 66                                                              | Boc-D-Ser(Bzl)                     | S-hydroxymethyl      |
| 15 | 41     | 67                                                              | Boc-D-Thr(Bzl)                     | (S,S)-1-hydroxyethyl |
| 16 | 42     | 68                                                              | Boc-D-Val                          | R-isopropyl          |
| 17 | 43     | 69                                                              | Boc-D-Tyr(BrZ)                     | R-4-hydroxybenzyl    |
| 18 | 44     | 70                                                              | Boc-L-Phenylglycine                | S-phenyl             |
| 19 | 45     | 71                                                              | Boc-L-Norvaline                    | S-propyl             |
| 20 | 46     | 72                                                              | Boc-D-Norvaline                    | R-propyl             |
| 21 | 47     | 73                                                              | Boc-L-Norleucine                   | S-butyl              |
| 22 | 48     | 74                                                              | Boc-D-Norleucine                   | R-butyl              |
| 23 | 49     | 75                                                              | Boc-L-Naphthylalanine              | S-2-naphthylmethyl   |
| 24 | 50     | 76                                                              | Boc-D-Naphthylalanine              | R-2-naphthylmethyl   |
| 25 | 51     | 77                                                              | Boc-L-Cyclohexylalanine            | S-cyclohexyl         |
| 26 | 52     | 78                                                              | Boc-D-Cyclohexylalanine            | R-cyclohexyl         |
|    | 79     | 1-Phenyl-1-cyclopropanecarboxylic acid                          | (1-Phenyl-cyclopropyl)-methyl      |                      |
|    | 80     | 2-Phenylbutyric acid                                            | 2-Phenylbutyl                      |                      |
|    | 81     | 3-Phenylbutyric acid                                            | 3-Phenylbutyl                      |                      |
|    | 82     | <i>m</i> -Tolylacetic acid                                      | <i>m</i> -tolylethyl               |                      |
|    | 83     | 3-Fluorophenylacetic acid                                       | 2-(3-Fluoro-phenyl)-ethyl          |                      |
|    | 84     | 3-Bromophenylacetic acid                                        | 2-(3-Bromo-phenyl)-ethyl           |                      |
|    | 85     | $\alpha,\alpha,\alpha$ -Trifluoro- <i>m</i> -Tolyl) acetic acid | 2-(3-Trifluoromethyl-phenyl)-ethyl |                      |
|    | 86     | <i>p</i> -Tolylacetic acid                                      | <i>p</i> -tolylethyl               |                      |
|    | 87     | 4-Fluorophenylacetic acid                                       | 2-(4-Fluoro-phenyl)-ethyl          |                      |

|     |                                            |                                          |
|-----|--------------------------------------------|------------------------------------------|
| 88  | 3-Methoxyphenylacetic acid                 | 2-(3-Methoxy-phenyl)-ethyl               |
| 89  | 4-Bromophenylacetic acid                   | 2-(4-Bromo-phenyl)-ethyl                 |
| 90  | 4-Methoxyphenylacetic acid                 | 2-(4-Methoxy-phenyl)-ethyl               |
| 91  | 4-Ethoxyphenylacetic acid                  | 2-(4-Ethoxy-phenyl)-ethyl                |
| 92  | 4-Isobutyl-alpha-Methylphenylacetic acid   | 2-(4-Isobutyl-phenyl)-propyl             |
| 93  | 3,4-Dichlorophenylacetic acid              | 3,4-Dichlorophenethyl                    |
| 94  | 3,5-Bis(Trifluoromethyl)-Phenylacetic acid | 2-(3,5-bis-trifluoromethyl-phenyl)-ethyl |
| 95  | 3-(3,4-Dimethoxyphenyl)-Propionic acid     | 3-(3,4-Dimethoxy-phenyl)-propyl          |
| 96  | Phenylacetic acid                          | Phenethyl                                |
| 97  | 3,4,5-Trimethoxybenzoic acid               | 3,4,5-Trimethoxy-benzyl                  |
| 98  | Butyric acid                               | Butyl                                    |
| 99  | Heptanoic acid                             | Heptyl                                   |
| 100 | Isobutyric acid                            | Isobutyl                                 |
| 101 | 2-Methylbutyric acid                       | 2-Methylbutyl                            |
| 102 | Isovaleric acid                            | 3-Methylbutyl                            |
| 103 | 3-Methylvaleric acid                       | 3-Methylpentyl                           |
| 104 | 4-Methylvaleric acid                       | 4-Methylpentyl                           |
| 105 | p-Toluic acid                              | 4-Methyl-benzyl                          |
| 106 | Cyclopentanecarboxylic acid                | Cyclopentyl-methyl                       |
| 107 | Cyclohexanecarboxylic acid                 | Cyclohexyl-methyl                        |
| 108 | Cyclohexylacetic acid                      | Cyclohexyl-ethyl                         |
| 109 | Cyclohexanebutyric acid                    | Cyclohexyl-butyl                         |
| 110 | Cycloheptanecarboxylic acid                | Cycloheptyl-methyl                       |
| 111 | 2-Methylcyclopropanecarboxylic acid        | (2-Methyl-cyclopropyl)-methyl            |
| 112 | Cyclobutanecarboxylic acid                 | Cyclobutyl-methyl                        |
| 113 | 3-Cyclopentylpropionic acid                | 3-Cyclopentyl-propyl                     |
| 114 | Cyclohexanepropionic acid                  | Cyclohexyl-propyl                        |
| 115 | 4-Methyl-1-Cyclohexanecarboxylic acid      | 4-Methyl-1-cyclohexyl-methyl             |
| 116 | 4-tert-Butyl-Cyclohexanecarboxylic acid    | 4-tert-butyl-cyclohexyl-methyl           |
| 117 | 4-Biphenylacetic acid                      | 2-Biphenyl-4-yl-ethyl                    |
| 118 | 1-Adamantanecarboxylic acid                | Adamantan-1-yl-methyl                    |
| 119 | 1-Adamantaneacetic acid                    | 2-Adamantan-1-yl-ethyl                   |
| 120 | 2-Norbornaneacetic acid                    | 2-Bicyclo[2.2.1]hept-2-yl-ethyl          |

Sublibrary 1: R<sub>1</sub> defined for samples 1-26 (28,392 compounds each). Sublibrary 2: R<sub>2</sub> defined for samples 27-52 (28,392 compounds each). Sublibrary 3: R<sub>3</sub> defined for samples 53-78 (28,392 compounds each). Sublibrary 4: R<sub>4</sub> defined for samples 79-120 (17,576 compounds each).

Table S3. Analytical information for compounds shown in Table 2.

| Compound    | Molecular weight | Molecular weight found | % Peak area at 254nm |
|-------------|------------------|------------------------|----------------------|
| a: 1754-113 | 697.86           | 698                    | 35:65 <sup>a</sup>   |
| b: 1754-56  | 721.93           | 722                    | 99                   |
| c: 1754-26  | 707.9            | 708                    | 99                   |
| d: 1754-20  | 771.94           | 772                    | 99                   |
| e: 1754-19  | 687.87           | 688                    | 99                   |
| f: 1754-31  | 721.93           | 722                    | 99                   |
| g: 1754-49  | 721.93           | 722                    | 99                   |
| h: 1753-103 | 662.86           | 663                    | 99                   |

<sup>a</sup> Compound 1754-113 contains a racemic mixture at the R3 position with a ratio of 35:65.

Dataset S1. Structure and activity information for 106 individual compounds derived from library 21:1344

All compounds were analyzed by LCMS. In all cases the LCMS data identified the desired compound as the major product; the MW found for the major product is reported in the table. 55 of the 106 compounds were tested in the duplex assay as crude material, while the remaining 51 compounds underwent RP-HPLC purification prior to obtaining their reported activity values. It should be noted that all "Pure" compounds were initially screened as "Crude" and the values reported for purified compounds did not deviate significantly from their activity levels when tested as crude. We therefore consider the activity values reported for the 56 "Crude" compounds to be accurate.

| Compound # | R1 Functionality   | R2 Functionality   | R3 Functionality  | R4 Functionality               | FPR1 Ki, nM | FPR2 Ki, nM |
|------------|--------------------|--------------------|-------------------|--------------------------------|-------------|-------------|
| 1754-1     | R-2-naphthylmethyl | R-4-hydroxybenzyl  | R-benzyl          | 4-methyl-1-cyclohexyl-methyl   | >10,000     | >10,000     |
| 1754-2     | R-2-naphthylmethyl | R-4-hydroxybenzyl  | R-4-hydroxybenzyl | cyclohexyl-propyl              | >10,000     | >10,000     |
| 1754-3     | R-2-naphthylmethyl | R-4-hydroxybenzyl  | R-butyl           | 4-methyl-1-cyclohexyl-methyl   | 4,078       | >10,000     |
| 1754-4     | R-2-naphthylmethyl | R-2-naphthylmethyl | R-benzyl          | cyclohexyl-methyl              | >10,000     | >10,000     |
| 1754-5     | R-2-naphthylmethyl | R-2-naphthylmethyl | R-benzyl          | 4-methyl-1-cyclohexyl-methyl   | >10,000     | >10,000     |
| 1754-6     | R-2-naphthylmethyl | R-2-naphthylmethyl | R-4-hydroxybenzyl | cyclohexyl-methyl              | >10,000     | >10,000     |
| 1754-7     | R-2-naphthylmethyl | R-2-naphthylmethyl | R-4-hydroxybenzyl | cyclohexyl-propyl              | >10,000     | >10,000     |
| 1754-8     | R-2-naphthylmethyl | R-2-naphthylmethyl | R-butyl           | cyclohexyl-methyl              | >10,000     | >10,000     |
| 1754-10    | S-propyl           | R-2-naphthylmethyl | R-butyl           | 4-methyl-1-cyclohexyl-methyl   | >10,000     | 135         |
| 1754-11    | S-isopropyl        | R-2-naphthylmethyl | R-propyl          | cyclopentyl-methyl             | >10,000     | 9           |
| 1754-12    | S-isopropyl        | R-2-naphthylmethyl | R-butyl           | cycloheptyl-methyl             | 2,667       | 12          |
| 1754-13    | S-isopropyl        | R-2-naphthylmethyl | R-butyl           | cyclobutyl-methyl              | 1,438       | 6           |
| 1754-14    | S-isopropyl        | R-cyclohexyl       | R-4-hydroxybenzyl | 3-methylpentyl                 | >10,000     | 505         |
| 1754-15    | S-isopropyl        | R-cyclohexyl       | R-4-hydroxybenzyl | cyclopentyl-methyl             | >10,000     | 183         |
| 1754-16    | S-isopropyl        | R-cyclohexyl       | R-4-hydroxybenzyl | cyclohexyl-methyl              | >10,000     | 69          |
| 1754-17    | S-isopropyl        | R-4-hydroxybenzyl  | R-benzyl          | cyclohexyl-methyl              | 753         | 10          |
| 1754-18    | S-isopropyl        | R-4-hydroxybenzyl  | R-benzyl          | 2-Biphenyl-4-yl-ethyl          | 355         | 21          |
| 1754-19    | S-isopropyl        | R-4-hydroxybenzyl  | R-4-hydroxybenzyl | cyclohexyl-methyl              | 3,368       | 6           |
| 1754-20    | S-isopropyl        | R-4-hydroxybenzyl  | R-4-hydroxybenzyl | 2-Biphenyl-4-yl-ethyl          | >10,000     | 15          |
| 1754-21    | S-isopropyl        | R-4-hydroxybenzyl  | R-butyl           | cyclohexyl-methyl              | 951         | 5           |
| 1754-22    | S-isopropyl        | R-4-hydroxybenzyl  | R-butyl           | 2-Biphenyl-4-yl-ethyl          | >10,000     | 31          |
| 1754-23    | S-isopropyl        | R-propyl           | R-benzyl          | cyclohexyl-methyl              | 1,053       | 1,500       |
| 1754-24    | S-isopropyl        | R-propyl           | R-benzyl          | 2-Biphenyl-4-yl-ethyl          | 330         | 229         |
| 1754-25    | S-isopropyl        | R-propyl           | R-4-hydroxybenzyl | cyclohexyl-methyl              | 721         | 2,400       |
| 1754-26    | S-isopropyl        | R-propyl           | R-4-hydroxybenzyl | 2-Biphenyl-4-yl-ethyl          | 46          | 70          |
| 1754-27    | S-isopropyl        | R-propyl           | R-butyl           | cyclohexyl-methyl              | 758         | 602         |
| 1754-28    | S-isopropyl        | R-propyl           | R-butyl           | 2-Biphenyl-4-yl-ethyl          | 279         | 58          |
| 1754-29    | S-isopropyl        | R-2-naphthylmethyl | R-benzyl          | cyclohexyl-methyl              | 754         | 8           |
| 1754-30    | S-isopropyl        | R-2-naphthylmethyl | R-benzyl          | 2-Biphenyl-4-yl-ethyl          | >10,000     | 51          |
| 1754-31    | S-isopropyl        | R-2-naphthylmethyl | R-4-hydroxybenzyl | cyclohexyl-methyl              | >10,000     | 1           |
| 1754-32    | S-isopropyl        | R-2-naphthylmethyl | R-4-hydroxybenzyl | 2-Biphenyl-4-yl-ethyl          | >10,000     | 21          |
| 1754-33    | S-isopropyl        | R-2-naphthylmethyl | R-butyl           | cyclohexyl-methyl              | 260         | 1           |
| 1754-34    | S-isopropyl        | R-2-naphthylmethyl | R-butyl           | 2-Biphenyl-4-yl-ethyl          | 664         | 11          |
| 1754-35    | S-propyl           | R-4-hydroxybenzyl  | R-benzyl          | cyclohexyl-methyl              | 385         | 98          |
| 1754-36    | S-propyl           | R-4-hydroxybenzyl  | R-benzyl          | 2-Biphenyl-4-yl-ethyl          | 1,123       | 175         |
| 1754-37    | S-propyl           | R-4-hydroxybenzyl  | R-4-hydroxybenzyl | cyclohexyl-methyl              | 436         | 105         |
| 1754-38    | S-propyl           | R-4-hydroxybenzyl  | R-4-hydroxybenzyl | 2-Biphenyl-4-yl-ethyl          | 1,792       | 98          |
| 1754-39    | S-propyl           | R-4-hydroxybenzyl  | R-butyl           | cyclohexyl-methyl              | 1,336       | 163         |
| 1754-40    | S-propyl           | R-4-hydroxybenzyl  | R-butyl           | 2-Biphenyl-4-yl-ethyl          | 877         | 265         |
| 1754-41    | S-propyl           | R-propyl           | R-benzyl          | cyclohexyl-methyl              | 228         | >10,000     |
| 1754-42    | S-propyl           | R-propyl           | R-benzyl          | 2-Biphenyl-4-yl-ethyl          | 63          | 591         |
| 1754-43    | S-propyl           | R-propyl           | R-4-hydroxybenzyl | cyclohexyl-methyl              | 90          | >10,000     |
| 1754-44    | S-propyl           | R-propyl           | R-4-hydroxybenzyl | 2-Biphenyl-4-yl-ethyl          | 2           | 162         |
| 1754-45    | S-propyl           | R-propyl           | R-butyl           | cyclohexyl-methyl              | 966         | 5,997       |
| 1754-46    | S-propyl           | R-propyl           | R-butyl           | 2-Biphenyl-4-yl-ethyl          | 473         | 410         |
| 1754-47    | S-propyl           | R-2-naphthylmethyl | R-benzyl          | cyclohexyl-methyl              | 1,373       | 74          |
| 1754-48    | S-propyl           | R-2-naphthylmethyl | R-benzyl          | 2-Biphenyl-4-yl-ethyl          | >10,000     | 512         |
| 1754-49    | S-propyl           | R-2-naphthylmethyl | R-4-hydroxybenzyl | cyclohexyl-methyl              | 2,322       | 33          |
| 1754-50    | S-propyl           | R-2-naphthylmethyl | R-4-hydroxybenzyl | 2-Biphenyl-4-yl-ethyl          | >10,000     | 445         |
| 1754-51    | S-propyl           | R-2-naphthylmethyl | R-butyl           | cyclohexyl-methyl              | 3,492       | 44          |
| 1754-52    | S-propyl           | R-2-naphthylmethyl | R-butyl           | 2-Biphenyl-4-yl-ethyl          | >10,000     | 454         |
| 1754-56    | S-butyl            | R-propyl           | R-4-hydroxybenzyl | 2-Biphenyl-4-yl-ethyl          | 2           | 1,321       |
| 1754-57    | S-benzyl           | S-hydroxymethyl    | R,S-phenyl        | 4-methyl-1-cyclohexyl-methyl   | 2,964       | >10,000     |
| 1754-59    | S-butyl            | S-hydroxymethyl    | S-2-butyl         | 4-methyl-1-cyclohexyl-methyl   | >10,000     | >10,000     |
| 1754-60    | S-butyl            | S-hydroxymethyl    | S-cyclohexyl      | 4-methyl-1-cyclohexyl-methyl   | >10,000     | >10,000     |
| 1754-61    | S-butyl            | R-propyl           | S-cyclohexyl      | 4-methyl-1-cyclohexyl-methyl   | 411         | 8,519       |
| 1754-64    | S-butyl            | S-hydroxymethyl    | S-2-butyl         | cyclohexyl-methyl              | >10,000     | >10,000     |
| 1754-65    | S-butyl            | S-hydroxymethyl    | S-2-butyl         | 4-tert-butyl-cyclohexyl-methyl | 1,847       | >10,000     |
| 1754-67    | S-butyl            | R-propyl           | S-cyclohexyl      | cyclobutyl-methyl              | 773         | >10,000     |
| 1754-68    | S-butyl            | R-butyl            | S-cyclohexyl      | cyclohexyl-methyl              | 2,336       | >10,000     |
| 1754-69    | S-propyl           | S-hydroxymethyl    | R,S-phenyl        | cyclohexyl-methyl              | 1,953       | >10,000     |
| 1754-70    | S-propyl           | S-hydroxymethyl    | R,S-phenyl        | 4-methyl-1-cyclohexyl-methyl   | 2,232       | >10,000     |
| 1754-71    | S-propyl           | S-hydroxymethyl    | R,S-phenyl        | 2-Biphenyl-4-yl-ethyl          | 1,265       | 3,799       |
| 1754-75    | S-butyl            | S-hydroxymethyl    | R,S-phenyl        | cyclohexyl-methyl              | 5,493       | >10,000     |
| 1754-76    | S-butyl            | S-hydroxymethyl    | R,S-phenyl        | 4-methyl-1-cyclohexyl-methyl   | 3,192       | >10,000     |
| 1754-77    | S-butyl            | S-hydroxymethyl    | R,S-phenyl        | 2-Biphenyl-4-yl-ethyl          | 1,504       | >10,000     |
| 1754-78    | S-butyl            | S-hydroxymethyl    | S-cyclohexyl      | 2-Biphenyl-4-yl-ethyl          | 797         | >10,000     |
| 1754-79    | S-propyl           | S-benzyl           | R,S-phenyl        | cyclohexyl-methyl              | 872         | >10,000     |
| 1754-80    | S-propyl           | S-benzyl           | R,S-phenyl        | 4-methyl-1-cyclohexyl-methyl   | 583         | >10,000     |
| 1754-81    | S-propyl           | S-benzyl           | R,S-phenyl        | 2-Biphenyl-4-yl-ethyl          | 121         | >10,000     |
| 1754-82    | S-propyl           | S-benzyl           | S-cyclohexyl      | cyclohexyl-methyl              | 560         | >10,000     |
| 1754-83    | S-propyl           | S-benzyl           | S-cyclohexyl      | 4-methyl-1-cyclohexyl-methyl   | 410         | >10,000     |
| 1754-84    | S-propyl           | S-benzyl           | S-cyclohexyl      | 2-Biphenyl-4-yl-ethyl          | 2,019       | >10,000     |
| 1754-85    | S-propyl           | S-isobutyl         | R,S-phenyl        | cyclohexyl-methyl              | 6,139       | 3,262       |
| 1754-86    | S-propyl           | S-isobutyl         | R,S-phenyl        | 4-methyl-1-cyclohexyl-methyl   | 3,641       | 5,861       |
| 1754-87    | S-propyl           | S-isobutyl         | R,S-phenyl        | 2-Biphenyl-4-yl-ethyl          | 663         | >10,000     |
| 1754-88    | S-propyl           | S-isobutyl         | S-cyclohexyl      | cyclohexyl-methyl              | 145         | >10,000     |
| 1754-89    | S-propyl           | S-isobutyl         | S-cyclohexyl      | 4-methyl-1-cyclohexyl-methyl   | 463         | >10,000     |
| 1754-90    | S-propyl           | S-isobutyl         | S-cyclohexyl      | 2-Biphenyl-4-yl-ethyl          | 1,133       | >10,000     |
| 1754-91    | S-butyl            | S-benzyl           | R,S-phenyl        | cyclohexyl-methyl              | 470         | >10,000     |
| 1754-93    | S-butyl            | S-benzyl           | R,S-phenyl        | 2-Biphenyl-4-yl-ethyl          | 52          | >10,000     |
| 1754-94    | S-butyl            | S-benzyl           | S-cyclohexyl      | cyclohexyl-methyl              | 375         | >10,000     |
| 1754-95    | S-butyl            | S-benzyl           | S-cyclohexyl      | 4-methyl-1-cyclohexyl-methyl   | 217         | >10,000     |
| 1754-96    | S-butyl            | S-benzyl           | S-cyclohexyl      | 2-Biphenyl-4-yl-ethyl          | 595         | >10,000     |

| Compound # | R1 Functionality | R2 Functionality | R3 Functionality  | R4 Functionality                | FPR1 Ki, nM | FPR2 Ki, nM |
|------------|------------------|------------------|-------------------|---------------------------------|-------------|-------------|
| 1754-97    | S-butyl          | S-isobutyl       | R,S-phenyl        | cyclohexyl-methyl               | >10,000     | 2,569       |
| 1754-98    | S-butyl          | S-isobutyl       | R,S-phenyl        | 4-methyl-1-cyclohexyl-methyl    | 1,684       | >10,000     |
| 1754-99    | S-butyl          | S-isobutyl       | R,S-phenyl        | 2-Biphenyl-4-yl-ethyl           | 592         | >10,000     |
| 1754-100   | S-butyl          | S-isobutyl       | S-cyclohexyl      | cyclohexyl-methyl               | 173         | >10,000     |
| 1754-101   | S-butyl          | S-isobutyl       | S-cyclohexyl      | 4-methyl-1-cyclohexyl-methyl    | 511         | >10,000     |
| 1754-102   | S-butyl          | S-isobutyl       | S-cyclohexyl      | 2-Biphenyl-4-yl-ethyl           | 677         | >10,000     |
| 1754-103   | S-benzyl         | S-benzyl         | R,S-phenyl        | 2-(3-methoxy-phenyl)-ethyl      | 15          | >10,000     |
| 1754-104   | S-benzyl         | S-benzyl         | R,S-phenyl        | 2-(4-isobutyl-phenyl)-propyl    | 7           | >10,000     |
| 1754-105   | S-benzyl         | S-benzyl         | R,S-phenyl        | 2-Biphenyl-4-yl-ethyl           | 12          | >10,000     |
| 1754-106   | S-butyl          | S-benzyl         | S-2-butyl         | 2-(3-methoxy-phenyl)-ethyl      | 84          | 3,863       |
| 1754-107   | S-butyl          | S-benzyl         | R,S-phenyl        | m-tolylethyl                    | 20          | >10,000     |
| 1754-108   | S-butyl          | S-benzyl         | R,S-phenyl        | p-tolylethyl                    | 37          | >10,000     |
| 1754-109   | S-butyl          | S-benzyl         | R,S-phenyl        | 2-(3-methoxy-phenyl)-ethyl      | 16          | >10,000     |
| 1754-110   | S-butyl          | S-benzyl         | R,S-phenyl        | 2-(4-methoxy-phenyl)-ethyl      | 14          | >10,000     |
| 1754-111   | S-butyl          | S-benzyl         | R,S-phenyl        | 2-(4-ethoxy-phenyl)-ethyl       | 73          | >10,000     |
| 1754-113   | S-benzyl         | S-benzyl         | R,S-phenyl        | phenethyl                       | 3           | >10,000     |
| 1754-114   | S-benzyl         | S-benzyl         | S-benzyl          | 3-(3,4-dimethoxy-phenyl)-propyl | 491         | >10,000     |
| 1754-115   | S-benzyl         | S-benzyl         | S-propyl          | phenethyl                       | 9           | >10,000     |
| 1754-116   | S-benzyl         | S-benzyl         | S-2-butyl         | phenethyl                       | 77          | >10,000     |
| 1858-480   | S-butyl          | R-propyl         | R-4-hydroxybenzyl | 4-methyl-1-cyclohexyl-methyl    | >10,000     | >10,000     |
| 1858-482   | S-butyl          | R-propyl         | R-4-hydroxybenzyl | cyclohexyl-methyl               | 28          | >10,000     |
| 1858-483   | S-propyl         | R-propyl         | R-4-hydroxybenzyl | 4-methyl-1-cyclohexyl-methyl    | >10,000     | >10,000     |

| Compound # | Molecular Weight | Molecular Weight Found | Compound grade |
|------------|------------------|------------------------|----------------|
| 1754-1     | 784              | 784                    | Pure           |
| 1754-2     | 814              | 814                    | Pure           |
| 1754-3     | 750              | 750                    | Pure           |
| 1754-4     | 804              | 804                    | Pure           |
| 1754-5     | 818              | 818                    | Pure           |
| 1754-6     | 820              | 820                    | Pure           |
| 1754-7     | 848              | 848                    | Pure           |
| 1754-8     | 770              | 771                    | Pure           |
| 1754-10    | 686              | 686                    | Pure           |
| 1754-11    | 644              | 644                    | Pure           |
| 1754-12    | 686              | 686                    | Pure           |
| 1754-13    | 644              | 644                    | Pure           |
| 1754-14    | 666              | 666                    | Pure           |
| 1754-15    | 664              | 664                    | Pure           |
| 1754-16    | 678              | 678                    | Pure           |
| 1754-17    | 672              | 673                    | Pure           |
| 1754-18    | 756              | 757                    | Pure           |
| 1754-19    | 688              | 688                    | Pure           |
| 1754-20    | 772              | 772                    | Pure           |
| 1754-21    | 638              | 638                    | Pure           |
| 1754-22    | 722              | 722                    | Pure           |
| 1754-23    | 608              | 608                    | Crude          |
| 1754-24    | 692              | 692                    | Crude          |
| 1754-25    | 624              | 624                    | Crude          |
| 1754-26    | 708              | 708                    | Pure           |
| 1754-27    | 574              | 574                    | Pure           |
| 1754-28    | 658              | 658                    | Crude          |
| 1754-29    | 706              | 706                    | Pure           |
| 1754-30    | 790              | 790                    | Pure           |
| 1754-31    | 722              | 722                    | Pure           |
| 1754-32    | 806              | 806                    | Pure           |
| 1754-33    | 672              | 672                    | Pure           |
| 1754-34    | 756              | 756                    | Pure           |
| 1754-35    | 672              | 672                    | Crude          |
| 1754-36    | 756              | 756                    | Crude          |
| 1754-37    | 688              | 688                    | Crude          |
| 1754-38    | 772              | 772                    | Crude          |
| 1754-39    | 638              | 638                    | Crude          |
| 1754-40    | 722              | 722                    | Crude          |
| 1754-41    | 608              | 608                    | Crude          |
| 1754-42    | 692              | 695                    | Crude          |
| 1754-43    | 624              | 624                    | Pure           |
| 1754-44    | 708              | 708                    | Pure           |
| 1754-45    | 574              | 574                    | Crude          |
| 1754-46    | 658              | 658                    | Crude          |
| 1754-47    | 706              | 706                    | Crude          |
| 1754-48    | 790              | 790                    | Crude          |
| 1754-49    | 722              | 722                    | Crude          |
| 1754-50    | 806              | 806                    | Crude          |
| 1754-51    | 672              | 672                    | Crude          |
| 1754-52    | 756              | 756                    | Crude          |
| 1754-56    | 722              | 722                    | Pure           |
| 1754-57    | 644              | 644                    | Pure           |
| 1754-59    | 590              | 590                    | Pure           |
| 1754-60    | 630              | 630                    | Pure           |
| 1754-61    | 642              | 642                    | Pure           |
| 1754-64    | 576              | 576                    | Crude          |
| 1754-65    | 632              | 632                    | Crude          |
| 1754-67    | 600              | 600                    | Crude          |
| 1754-68    | 642              | 642                    | Crude          |
| 1754-69    | 582              | 582                    | Crude          |
| 1754-70    | 596              | 596                    | Crude          |
| 1754-71    | 666              | 666                    | Crude          |
| 1754-75    | 596              | 596                    | Crude          |
| 1754-76    | 610              | 610                    | Crude          |
| 1754-77    | 680              | 680                    | Crude          |
| 1754-78    | 700              | 700                    | Crude          |
| 1754-79    | 642              | 642                    | Crude          |
| 1754-80    | 656              | 656                    | Crude          |
| 1754-81    | 726              | 726                    | Crude          |
| 1754-82    | 662              | 662                    | Crude          |
| 1754-83    | 676              | 676                    | Crude          |
| 1754-84    | 746              | 746                    | Crude          |
| 1754-85    | 608              | 608                    | Crude          |
| 1754-86    | 622              | 622                    | Crude          |
| 1754-87    | 692              | 692                    | Crude          |
| 1754-88    | 628              | 628                    | Crude          |
| 1754-89    | 642              | 642                    | Crude          |
| 1754-90    | 712              | 712                    | Crude          |
| 1754-91    | 656              | 656                    | Crude          |
| 1754-93    | 740              | 740                    | Pure           |
| 1754-94    | 676              | 676                    | Crude          |
| 1754-95    | 690              | 690                    | Crude          |
| 1754-96    | 760              | 760                    | Crude          |
| 1754-97    | 622              | 622                    | Crude          |
| 1754-98    | 636              | 636                    | Crude          |

| Compound # | Molecular Weight | Molecular Weight Found | Compound grade |
|------------|------------------|------------------------|----------------|
| 1754-99    | 706              | 706                    | Crude          |
| 1754-100   | 642              | 642                    | Crude          |
| 1754-101   | 656              | 656                    | Pure           |
| 1754-102   | 726              | 726                    | Crude          |
| 1754-103   | 728              | 728                    | Crude          |
| 1754-104   | 768              | 768                    | Pure           |
| 1754-105   | 774              | 774                    | Pure           |
| 1754-106   | 674              | 674                    | Pure           |
| 1754-107   | 678              | 678                    | Pure           |
| 1754-108   | 678              | 678                    | Crude          |
| 1754-109   | 694              | 694                    | Pure           |
| 1754-110   | 694              | 694                    | Pure           |
| 1754-111   | 708              | 708                    | Pure           |
| 1754-113   | 698              | 698                    | Pure           |
| 1754-114   | 786              | 786                    | Crude          |
| 1754-115   | 664              | 664                    | Pure           |
| 1754-116   | 678              | 678                    | Pure           |
| 1858-480   | 652              | 652                    | Pure           |
| 1858-482   | 638              | 638                    | Pure           |
| 1858-483   | 638              | 638                    | Pure           |

| Compound # | SMILES                              |
|------------|-------------------------------------|
| 1754-1     | <chem>O=C1CC(C)C(C)C(=O)C1=O</chem> |
| 1754-2     | <chem>O=C1CC(C)C(C)C(=O)C1=O</chem> |
| 1754-3     | <chem>O=C1CC(C)C(C)C(=O)C1=O</chem> |
| 1754-4     | <chem>O=C1N(C)CC(C)C(=O)C1=O</chem> |
| 1754-5     | <chem>O=C1N(C)CC(C)C(=O)C1=O</chem> |
| 1754-6     | <chem>O=C1CC(C)C(C)C(=O)C1=O</chem> |
| 1754-7     | <chem>O=C1CC(C)C(C)C(=O)C1=O</chem> |
| 1754-8     | <chem>O=C1N(C)CC(C)C(=O)C1=O</chem> |
| 1754-10    | <chem>O=C1N(C)CC(C)C(=O)C1=O</chem> |
| 1754-11    | <chem>O=C1N(C)CC(C)C(=O)C1=O</chem> |
| 1754-12    | <chem>O=C1N(C)CC(C)C(=O)C1=O</chem> |
| 1754-13    | <chem>O=C1N(C)CC(C)C(=O)C1=O</chem> |
| 1754-14    | <chem>O=C1CC(C)C(C)C(=O)C1=O</chem> |
| 1754-15    | <chem>O=C1CC(C)C(C)C(=O)C1=O</chem> |
| 1754-16    | <chem>O=C1CC(C)C(C)C(=O)C1=O</chem> |
| 1754-17    | <chem>O=C1CC(C)C(C)C(=O)C1=O</chem> |
| 1754-18    | <chem>O=C1CC(C)C(C)C(=O)C1=O</chem> |
| 1754-19    | <chem>O=C1CC(C)C(C)C(=O)C1=O</chem> |
| 1754-20    | <chem>O=C1CC(C)C(C)C(=O)C1=O</chem> |
| 1754-21    | <chem>O=C1CC(C)C(C)C(=O)C1=O</chem> |
| 1754-22    | <chem>O=C1CC(C)C(C)C(=O)C1=O</chem> |
| 1754-23    | <chem>O=C1N(C)CC(C)C(=O)C1=O</chem> |
| 1754-24    | <chem>O=C1N(C)CC(C)C(=O)C1=O</chem> |
| 1754-25    | <chem>O=C1CC(C)C(C)C(=O)C1=O</chem> |
| 1754-26    | <chem>O=C1CC(C)C(C)C(=O)C1=O</chem> |
| 1754-27    | <chem>O=C1N(C)CC(C)C(=O)C1=O</chem> |
| 1754-28    | <chem>O=C1N(C)CC(C)C(=O)C1=O</chem> |
| 1754-29    | <chem>O=C1N(C)CC(C)C(=O)C1=O</chem> |
| 1754-30    | <chem>O=C1N(C)CC(C)C(=O)C1=O</chem> |
| 1754-31    | <chem>O=C1CC(C)C(C)C(=O)C1=O</chem> |
| 1754-32    | <chem>O=C1CC(C)C(C)C(=O)C1=O</chem> |
| 1754-33    | <chem>O=C1N(C)CC(C)C(=O)C1=O</chem> |
| 1754-34    | <chem>O=C1N(C)CC(C)C(=O)C1=O</chem> |
| 1754-35    | <chem>O=C1CC(C)C(C)C(=O)C1=O</chem> |
| 1754-36    | <chem>O=C1CC(C)C(C)C(=O)C1=O</chem> |
| 1754-37    | <chem>O=C1CC(C)C(C)C(=O)C1=O</chem> |
| 1754-38    | <chem>O=C1CC(C)C(C)C(=O)C1=O</chem> |
| 1754-39    | <chem>O=C1CC(C)C(C)C(=O)C1=O</chem> |
| 1754-40    | <chem>O=C1CC(C)C(C)C(=O)C1=O</chem> |
| 1754-41    | <chem>O=C1N(C)CC(C)C(=O)C1=O</chem> |
| 1754-42    | <chem>O=C1N(C)CC(C)C(=O)C1=O</chem> |
| 1754-43    | <chem>O=C1CC(C)C(C)C(=O)C1=O</chem> |
| 1754-44    | <chem>O=C1CC(C)C(C)C(=O)C1=O</chem> |
| 1754-45    | <chem>O=C1N(C)CC(C)C(=O)C1=O</chem> |
| 1754-46    | <chem>O=C1N(C)CC(C)C(=O)C1=O</chem> |
| 1754-47    | <chem>O=C1N(C)CC(C)C(=O)C1=O</chem> |
| 1754-48    | <chem>O=C1N(C)CC(C)C(=O)C1=O</chem> |
| 1754-49    | <chem>O=C1CC(C)C(C)C(=O)C1=O</chem> |
| 1754-50    | <chem>O=C1CC(C)C(C)C(=O)C1=O</chem> |
| 1754-51    | <chem>O=C1N(C)CC(C)C(=O)C1=O</chem> |
| 1754-52    | <chem>O=C1N(C)CC(C)C(=O)C1=O</chem> |
| 1754-56    | <chem>O=C1CC(C)C(C)C(=O)C1=O</chem> |
| 1754-57    | <chem>O=C1N(C)CC(C)C(=O)C1=O</chem> |
| 1754-59    | <chem>O=C1N(C)CC(C)C(=O)C1=O</chem> |
| 1754-60    | <chem>O=C1N(C)CC(C)C(=O)C1=O</chem> |
| 1754-61    | <chem>O=C1N(C)CC(C)C(=O)C1=O</chem> |
| 1754-64    | <chem>O=C1N(C)CC(C)C(=O)C1=O</chem> |
| 1754-65    | <chem>O=C1N(C)CC(C)C(=O)C1=O</chem> |
| 1754-67    | <chem>O=C1N(C)CC(C)C(=O)C1=O</chem> |
| 1754-68    | <chem>O=C1N(C)CC(C)C(=O)C1=O</chem> |
| 1754-69    | <chem>O=C1N(C)CC(C)C(=O)C1=O</chem> |
| 1754-70    | <chem>O=C1N(C)CC(C)C(=O)C1=O</chem> |
| 1754-71    | <chem>O=C1N(C)CC(C)C(=O)C1=O</chem> |
| 1754-75    | <chem>O=C1N(C)CC(C)C(=O)C1=O</chem> |
| 1754-76    | <chem>O=C1N(C)CC(C)C(=O)C1=O</chem> |
| 1754-77    | <chem>O=C1N(C)CC(C)C(=O)C1=O</chem> |
| 1754-78    | <chem>O=C1N(C)CC(C)C(=O)C1=O</chem> |
| 1754-79    | <chem>O=C1N(C)CC(C)C(=O)C1=O</chem> |
| 1754-80    | <chem>O=C1N(C)CC(C)C(=O)C1=O</chem> |
| 1754-81    | <chem>O=C1N(C)CC(C)C(=O)C1=O</chem> |
| 1754-82    | <chem>O=C1N(C)CC(C)C(=O)C1=O</chem> |
| 1754-83    | <chem>O=C1N(C)CC(C)C(=O)C1=O</chem> |
| 1754-84    | <chem>O=C1N(C)CC(C)C(=O)C1=O</chem> |
| 1754-85    | <chem>O=C1N(C)CC(C)C(=O)C1=O</chem> |
| 1754-86    | <chem>O=C1N(C)CC(C)C(=O)C1=O</chem> |
| 1754-87    | <chem>O=C1N(C)CC(C)C(=O)C1=O</chem> |
| 1754-88    | <chem>O=C1N(C)CC(C)C(=O)C1=O</chem> |
| 1754-89    | <chem>O=C1N(C)CC(C)C(=O)C1=O</chem> |
| 1754-90    | <chem>O=C1N(C)CC(C)C(=O)C1=O</chem> |
| 1754-91    | <chem>O=C1N(C)CC(C)C(=O)C1=O</chem> |
| 1754-93    | <chem>O=C1N(C)CC(C)C(=O)C1=O</chem> |
| 1754-94    | <chem>O=C1N(C)CC(C)C(=O)C1=O</chem> |





Dataset S2. Structure and activity information for 4 individual compounds derived from library 36:1481

All compounds were analyzed by LCMS. In all cases the LCMS data identified the desired compound as the major product; the MW found for the major product is reported in the table. All 4 compounds were tested in the duplex assay as pure material, as they underwent RP-HPLC purification prior to obtaining their reported activity values.

| Compound # | R1 functionality | R2 functionality                   | R3 functionality            | FPR1 Ki, nM | FPR2 Ki, nM |
|------------|------------------|------------------------------------|-----------------------------|-------------|-------------|
| 1753-101   | S-methyl         | R-4-(1-methyl-3-phenyl urea) butyl | 4-phenylbutyl               | 1           | >10,000     |
| 1753-102   | S-methyl         | R-4-(1-methyl-3-phenyl urea) butyl | 4-methyl-1-cyclohexylmethyl | 6           | >10,000     |
| 1753-103   | S-methyl         | R-butyl                            | 4-phenylbutyl               | 4           | >10,000     |
| 1753-104   | S-methyl         | R-butyl                            | 4-methyl-1-cyclohexylmethyl | 21          | >10,000     |

| Compound # | Molecular Weight | Molecular Weight Found | Compound grade |
|------------|------------------|------------------------|----------------|
| 1753-101   | 811              | 811                    | Pure           |
| 1753-102   | 789              | 789                    | Pure           |
| 1753-103   | 663              | 663                    | Pure           |
| 1753-104   | 641              | 641                    | Pure           |

| Compound # | SMILES                                                                                                           |
|------------|------------------------------------------------------------------------------------------------------------------|
| 1753-101   | <chem>O=C(Nc1ccccc1)N(CCCC[C@@H](N(CCCCc1ccccc1)C(=O)Nc1ccccc1)CN([C@H](CNC(=O)Nc1ccccc1)C(=O)Nc1ccccc1)C</chem> |
| 1753-102   | <chem>O=C(Nc1ccccc1)N(CCCC[C@@H](N(CC1CCC(CC1)C)C(=O)Nc1ccccc1)CN([C@H](CNC(=O)Nc1ccccc1)C(=O)Nc1ccccc1)C</chem> |
| 1753-103   | <chem>O=C(Nc1ccccc1)N([C@H](CCCC)CN([C@H](CNC(=O)Nc1ccccc1)C)C(=O)Nc1ccccc1)CCCCc1ccccc1</chem>                  |
| 1753-104   | <chem>O=C(Nc1ccccc1)N([C@H](CCCC)CN([C@H](CNC(=O)Nc1ccccc1)C)C(=O)Nc1ccccc1)CC1CCC(CC1)C</chem>                  |
